# Supplementary material for: Uniaxially oriented FAxMA1−xPbI3 films with low intragrain and structural defects for self-powered photodetectors
Source: Royal Society of Chemistry journal article supplement (doi:10.1039/d2tc00938b), 2022-01-01
Supplement: d2tc00938b1.pdf [file d2tc00938b1.pdf]

## Electronic Supporting Information

### **Uniaxial-oriented $\text{FA}_x\text{MA}_{1-x}\text{PbI}_3$ films with low intragrain and structural defects for self-powered photodetectors**

*Li Zhang,<sup>a</sup> Teng Zhang,<sup>a</sup> Yaping Gao,<sup>a</sup> Deliang Cui,<sup>a</sup> Qilong Wang,<sup>b</sup> Gang Lian,<sup>\*a</sup> Haohai Yu,<sup>\*a</sup> huaijin Zhang<sup>a</sup>, and Ching-Ping Wong<sup>c</sup>*

<sup>a</sup>State Key Lab of Crystal Materials, Shandong University, Jinan 250100, P.R. China

<sup>b</sup>Key Laboratory for Special Functional Aggregated Materials of Education Ministry, School of Chemistry & Chemical Engineering, Shandong University, Jinan 250100, P.R. China

<sup>c</sup>School of Materials Science and Engineering, Georgia Institute of Technology, Atlanta, Georgia 30332, United States

\* Corresponding Authors:

E-mail: liangang@sdu.edu.cn, haohaiyu@sdu.edu.cn

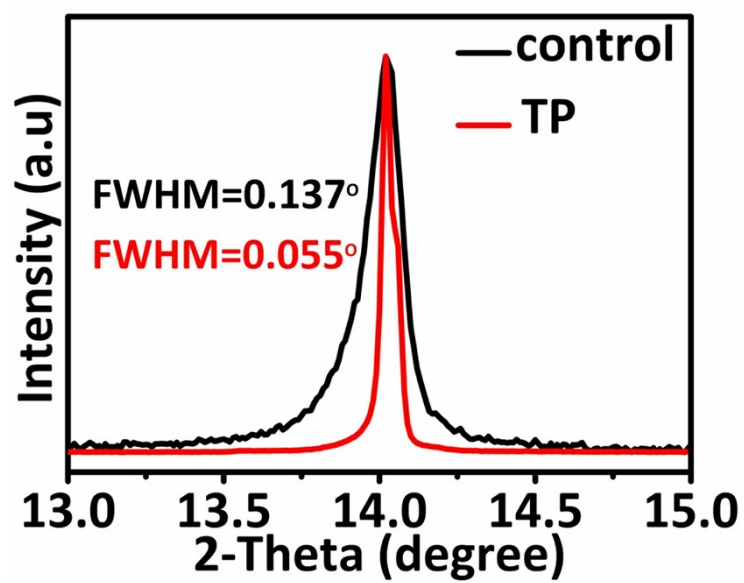

Fig. S1 XRD patterns from 13° to 15° of control and TP films.

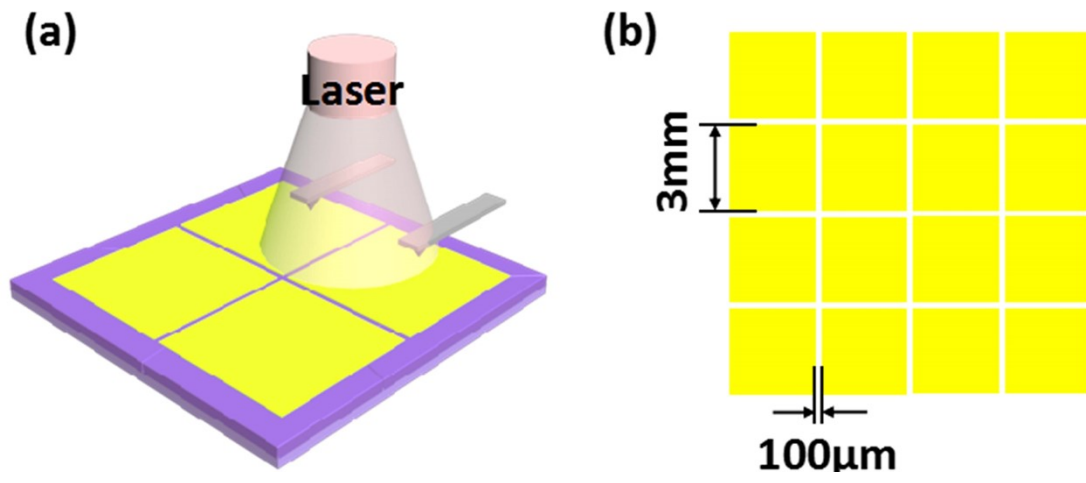

Fig. S2 (a) Schematic of device structure and (b) Mask pattern.

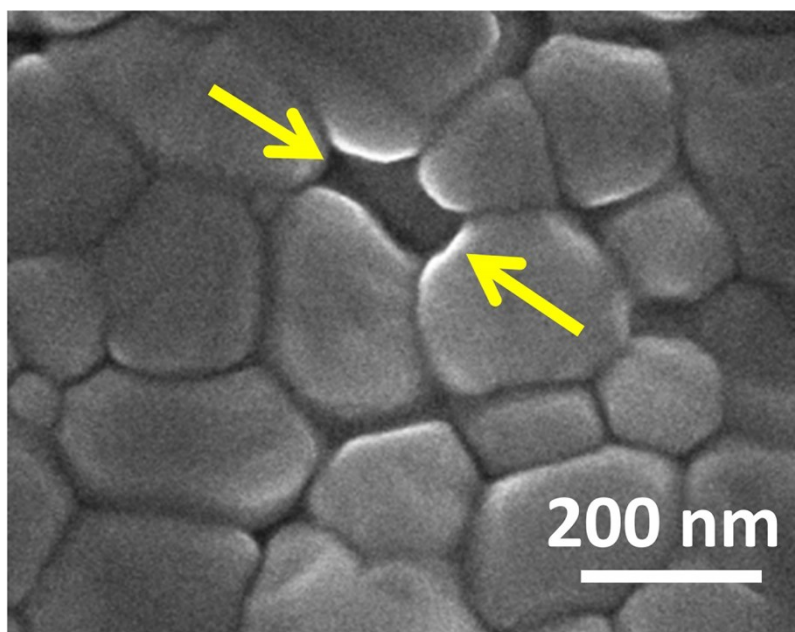

**Fig. S3** High-magnification top-view SEM image of SnO<sub>2</sub>-control film.

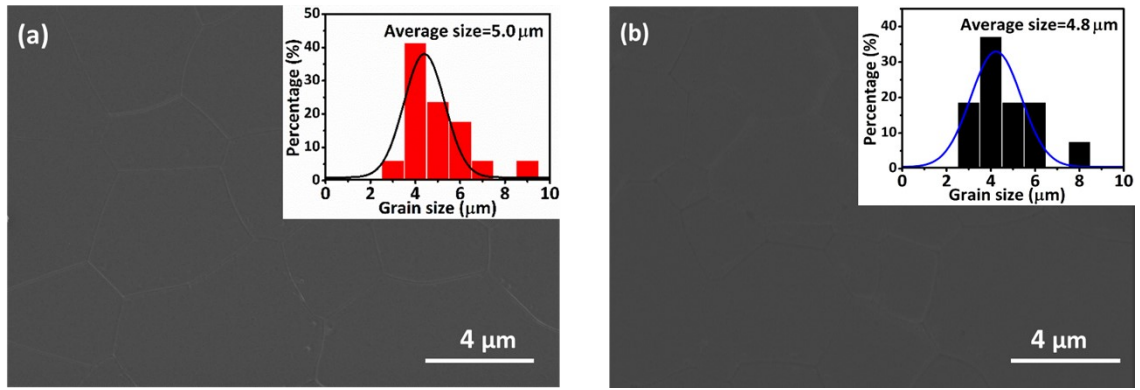

**Fig. S4** Top-view SEM images and particle size distribution of (a) SnO<sub>2</sub>-TP75 and (b) SnO<sub>2</sub>-TP100 films.

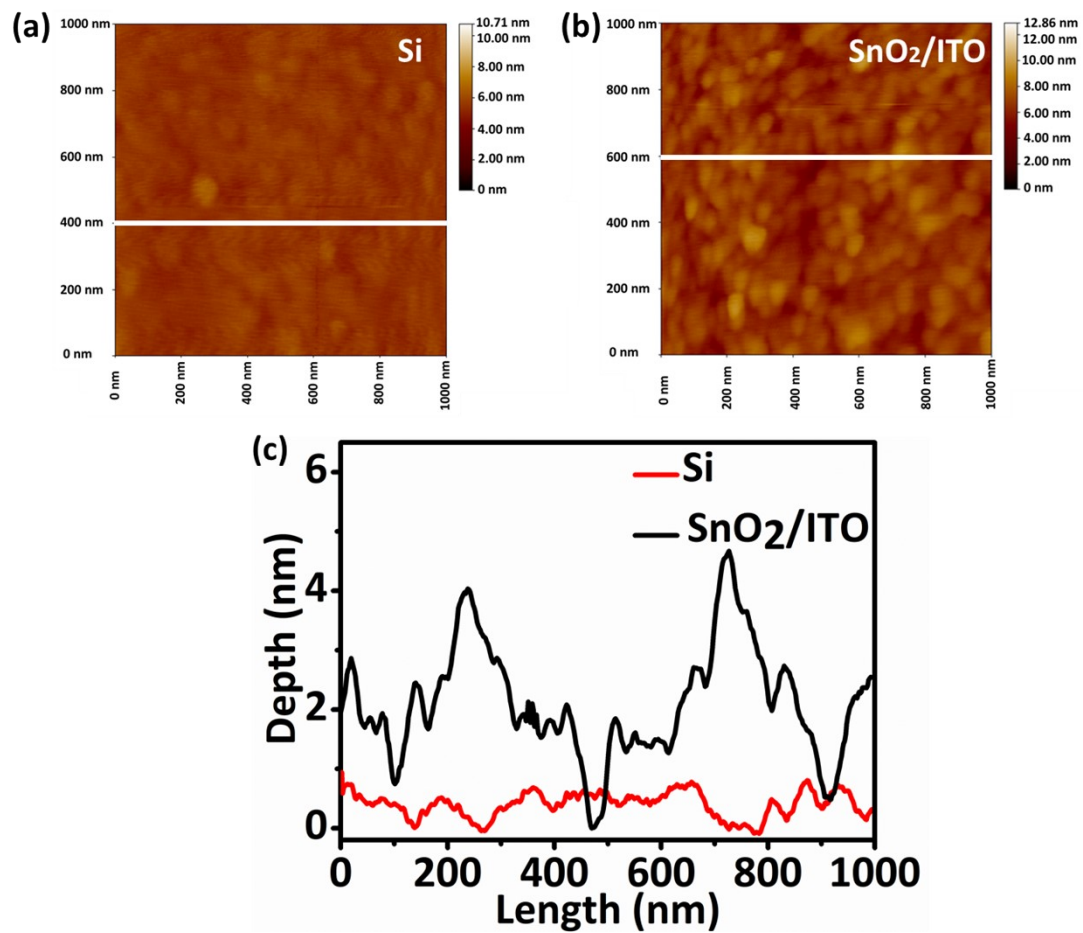

**Fig. S5** AFM topographic images of (a) Si substrate and (b) SnO<sub>2</sub>/ITO substrate; (c) surface roughness of Si and SnO<sub>2</sub>/ITO substrates.

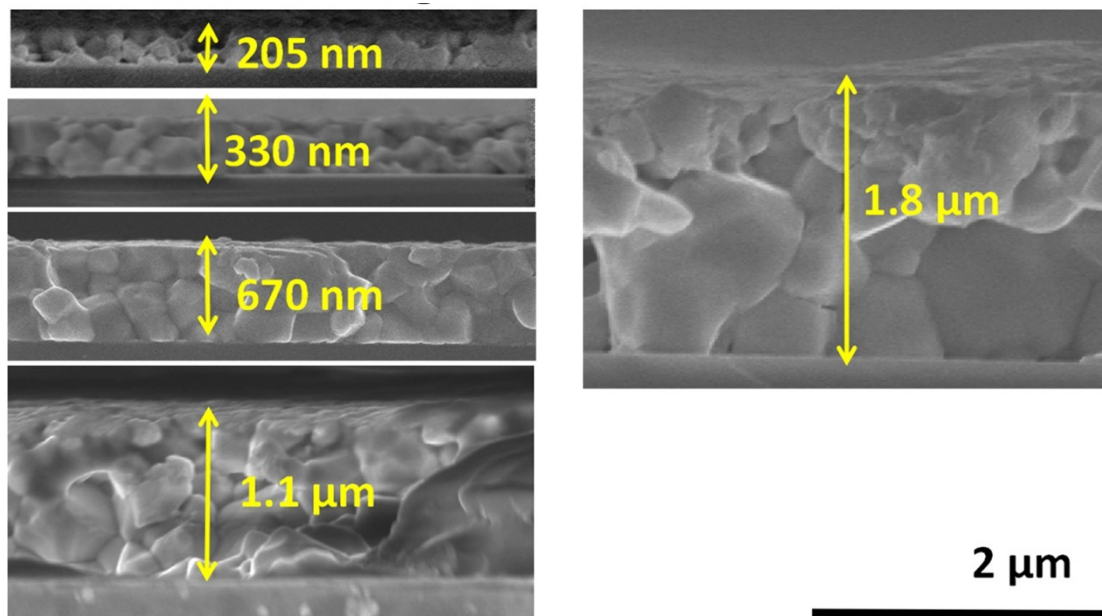

**Fig. S6** Cross-section SEM images of SnO<sub>2</sub>-control films with different thickness.

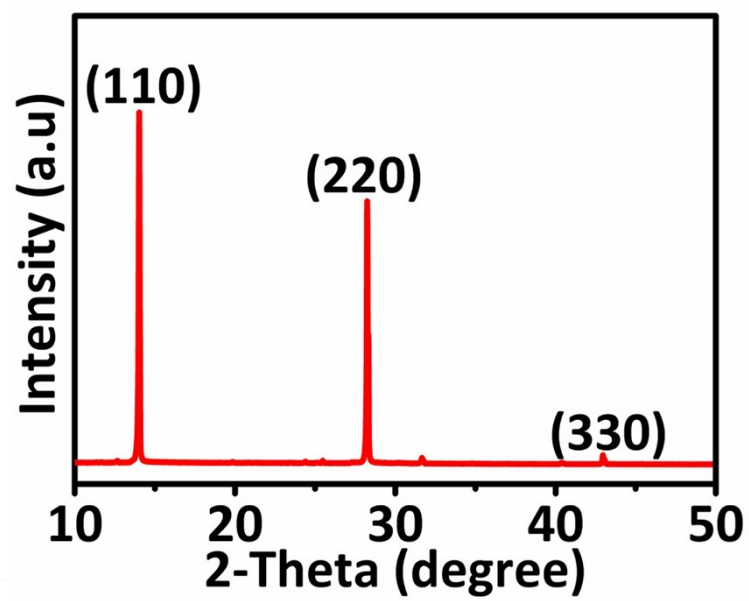

Fig. S7 XRD pattern of SnO<sub>2</sub>-TP75 film.



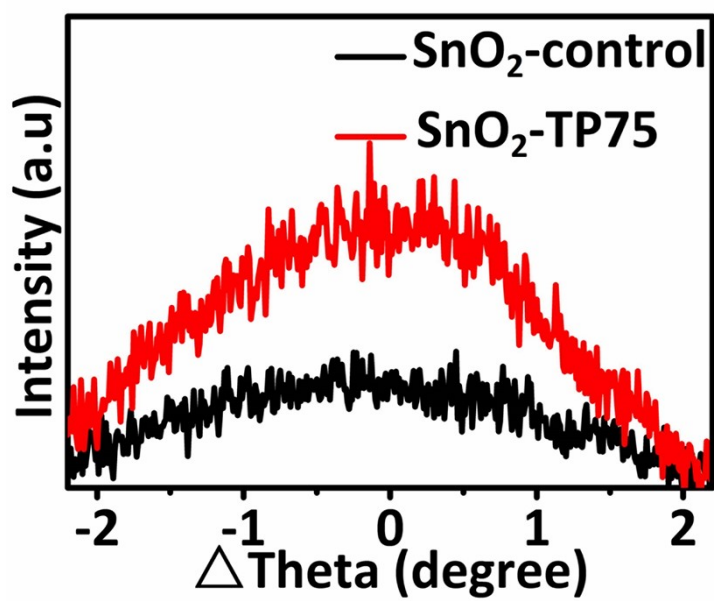

Fig. S8 Rocking curves of SnO<sub>2</sub>-control and SnO<sub>2</sub>-TP75 films.

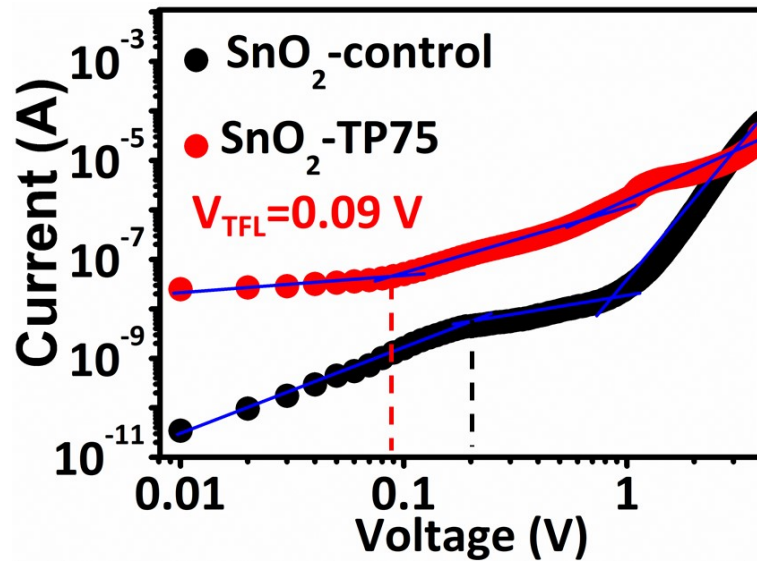

Fig. S9 Dark I-V curve of electron-only photodetector based of SnO<sub>2</sub>-control and SnO<sub>2</sub>-TP75 films.

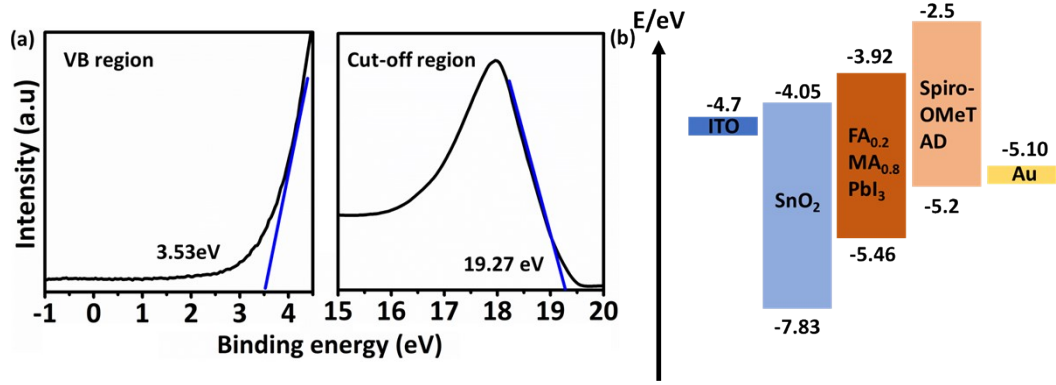

Fig. S10 (a) Ultraviolet photoelectron spectra of SnO<sub>2</sub>-TP75 film, (b) diagram of the energy levels of the SPPDs

based on SnO<sub>2</sub>-TP75 film.

To obtain the diagram of the energy levels of SPPDs, we carried out UPS measurements to profile the CBM and VBM of the SnO<sub>2</sub>-TP75 film. Equations (1) and (2) were used for the calculation of Fermi energy ( $E_f$ ) and  $E_{VBM}$ , respectively:

$$E_f = -(h\nu - E_{cut-off}) \quad (1)$$

$$E_{VBM} = -[h\nu - (E_{cut-off} - E_{onset})] = -IE \quad (2)$$

wherein,  $E_{cut-off}$  and  $E_{onset}$  are the cut-off and onset energy of the photo-electron signals, respectively,  $h\nu$  (21.2 eV) is the photon energy of the He I $\alpha$  source;  $IE$  is ionization energy [Advanced Energy Materials, 2021, 11(28): 2101080]. According to the above equations, the VBM of SnO<sub>2</sub>-TP75 film locates at -5.46 eV. The optical bandgap ( $E_{g,opt}$ ) of SnO<sub>2</sub>-TP75 film is extracted from the corresponding absorption spectrum (Fig. S11). The  $E_{g,opt}$  of SnO<sub>2</sub>-TP75 film is 1.54 eV. Thus, the CBM of the SnO<sub>2</sub>-TP75 film locates at -3.92 eV. The corresponding diagram of the energy levels associated with the device was shown in Fig. S10b.

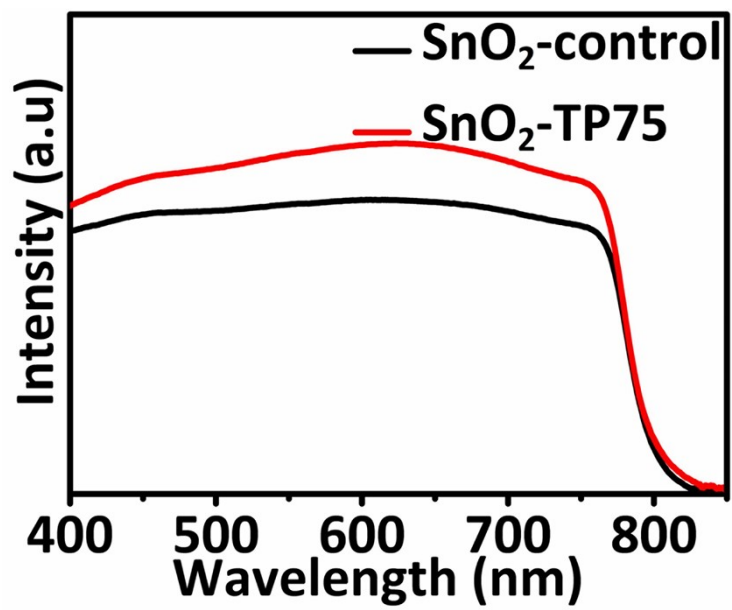

Fig. S11 UV-vis absorptions of SnO<sub>2</sub>-control and SnO<sub>2</sub>-TP75 film.

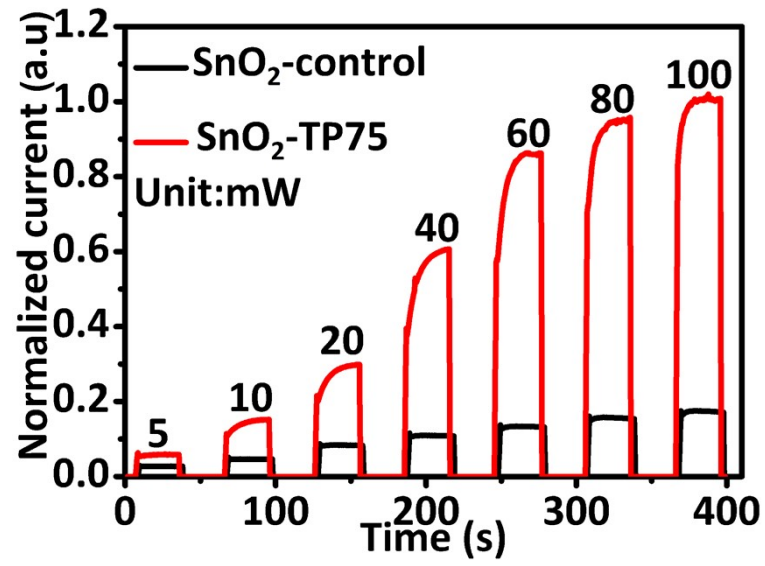

Fig. S12 I-T curves of SPPD based on SnO<sub>2</sub>-control and SnO<sub>2</sub>-TP75 films under different power intensities of 671 nm laser illumination at a bias of 0 V.

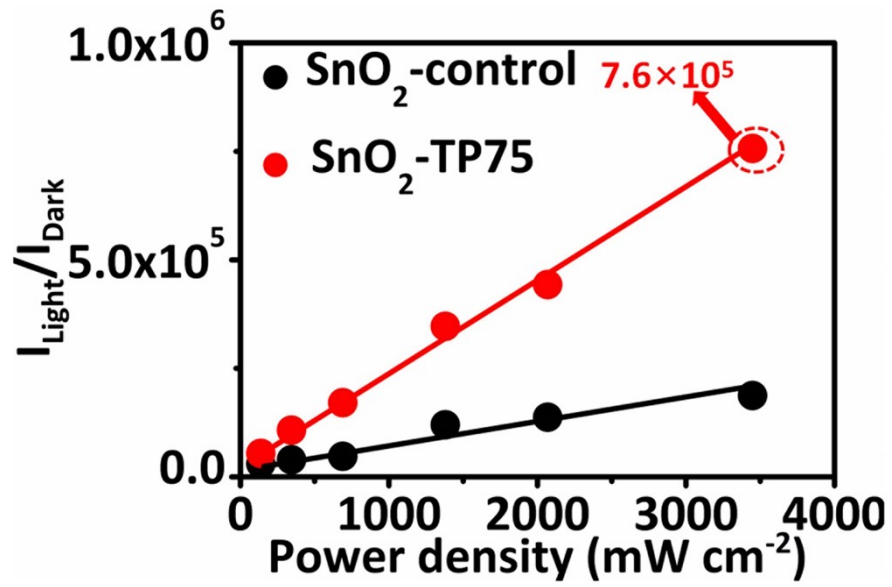

**Fig. S13**  $I_{\text{light}}/I_{\text{dark}}$  ratio of SPPD based on SnO<sub>2</sub>-control and SnO<sub>2</sub>-TP75 films under different power intensities of

671 nm laser illumination at a bias of 0 V.

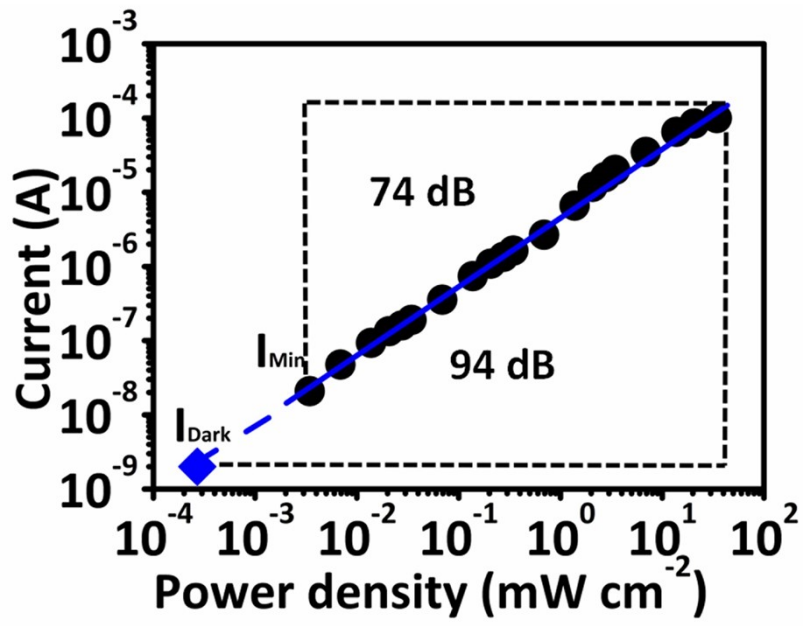

Fig. S14 Linear dynamic range of SPPD based on  $\text{SnO}_2$ -TP75 film under 671 nm laser illumination at a bias of 0 V.

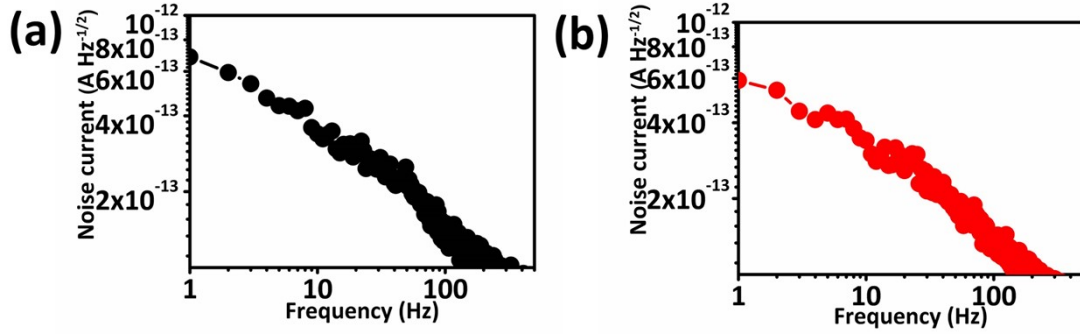

**Fig. S15** Frequency-dependent noise current of SPPD based on perovskite films at a bias of 0 V (a) SnO<sub>2</sub>-control film and (b) SnO<sub>2</sub>-TP75 film.

Detectivity ( $D^*$ ) is used to evaluate the performance of photodetector. It can be calculated via

$$D^* = \frac{R\sqrt{AB}}{i_n}$$

the equation  $D^* = \frac{R\sqrt{AB}}{i_n}$ , where  $A$  is the active area of the device,  $B$  is the detection bandwidth

and  $i_n$  is the noise current. **In this work**,  $i_n$  is generally dominated by  $1/f$  noise in the low-frequency

region. As shown in *Fig. S15*, when the frequency is 50 Hz, the detected  $1/f$  noise currents of the

two devices are 0.22 pA Hz<sup>-1/2</sup> and 0.21 pA Hz<sup>-1/2</sup>. On increasing the frequency over 50 Hz, the

noise of devices gradually approach the shot noise limit ( $i_{shot} = (2eI_d B)^{1/2}$ ) of 0.18 pA Hz<sup>-1/2</sup> and 0.2

pA Hz<sup>-1/2</sup>. With continuously increasing the frequency,  $D^*$  can be calculated from the shot noise.

$$D^* = \frac{R\sqrt{AB}}{i_n}$$

However, according to  $D^* = \frac{R\sqrt{AB}}{i_n}$ , the lower  $i_n$ , the larger  $D^*$  value. Therefore, the modulation

frequency was set to 50 Hz.



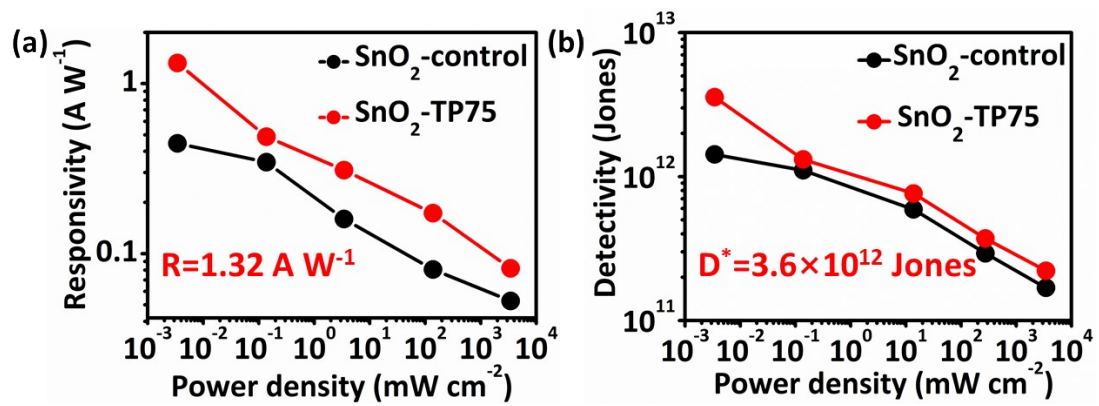

Fig. S16 (a) Responsivity and (b) detectivity of photodetectors based on SnO<sub>2</sub>-control and SnO<sub>2</sub>-TP75 films under

671 nm laser illumination at a bias of 1 V.

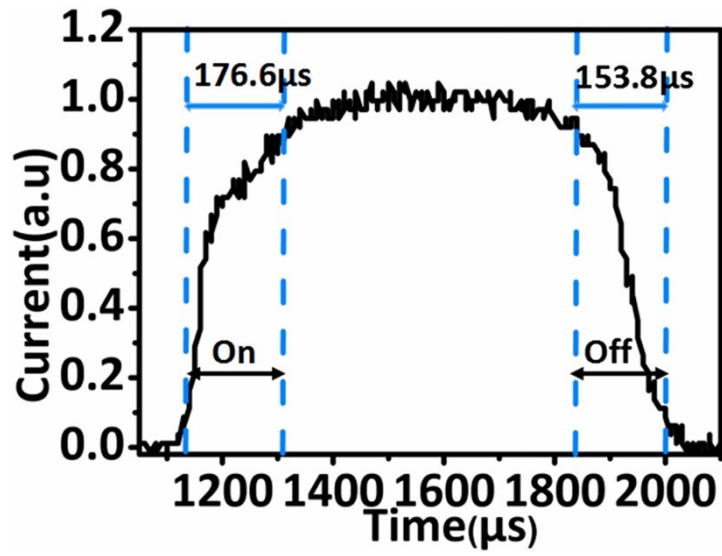

**Fig. S17** Response-recovery time curve of SPPD based on  $\text{SnO}_2$ -control film under 671 nm laser illumination at a bias of 0 V.

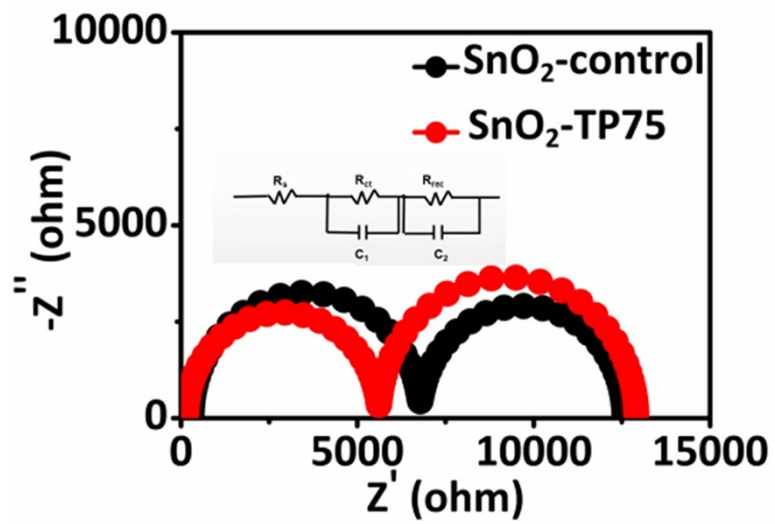

Fig. S18 Nyquist plots of photodetector based on SnO<sub>2</sub>-control and SnO<sub>2</sub>-TP75 films.

**Table S1.** The bi-exponential equation parameters for fitting the TRPL curves of control and TP films.

| Sample       | $\tau_1$ | $A_1$ | $\tau_2$ | $A_2$ | $\tau_{ave}$ |
|--------------|----------|-------|----------|-------|--------------|
| Control film | 19.3 ns  | 72.3% | 239.6 ns | 27.7% | 201.4 ns     |
| TP film      | 120.2 ns | 37.9% | 985.8 ns | 62.1% | 925.8 ns     |

**Table S2.** The bi-exponential equation parameters for fitting the TRPL curves of SnO<sub>2</sub>-control and SnO<sub>2</sub>-TP75 films.

| Sample                         | $\tau_1$ | $A_1$ | $\tau_2$ | $A_2$ | $\tau_{ave}$ |
|--------------------------------|----------|-------|----------|-------|--------------|
| SnO <sub>2</sub> -Control film | 21.0 ns  | 85.7% | 265.7 ns | 14.3% | 187.0 ns     |
| SnO <sub>2</sub> -TP75 film    | 66.2 ns  | 45.5% | 630.9 ns | 54.5% | 585.4 ns     |

**Table S3.** Key figure-of-merit values for SPPD fabricated in the present study compared with those of devices reported in the literature.

| Structure                                                                                                                                                  | Responsivity<br>(mA W <sup>-1</sup> ) | Detectivity<br>(Jones)     | Wavelength<br>(nm) | Ref.                 |
|------------------------------------------------------------------------------------------------------------------------------------------------------------|---------------------------------------|----------------------------|--------------------|----------------------|
| Si/SnO <sub>2</sub> /MAPbI <sub>3</sub> /MoO <sub>3</sub>                                                                                                  | 50.9                                  | 2.23×10 <sup>12</sup>      | 300-1150           | 1                    |
| ITO/PEDOT:PSS/MAPbI <sub>3</sub> /PCBM/Ag                                                                                                                  | 436                                   | 3.125×10 <sup>10</sup>     | 300-800            | 2                    |
| ITO/Triazine-Th-OMeTAD/MAPbI <sub>3</sub> /PC <sub>61</sub> BM/BCP/<br>Ag                                                                                  | 470                                   | 8.2×10 <sup>12</sup>       | 300-780            | 3                    |
| Ag/spiro-OMeTAD/MAPbI <sub>3</sub> /ZnO:PBI-H/ITO                                                                                                          | 350                                   | 2.5×10 <sup>13</sup>       | 370-770            | 4                    |
| FTO/c-TiO <sub>2</sub> /Cs <sub>0.05</sub> MA <sub>0.16</sub> FA <sub>0.79</sub> Pb(I <sub>0.9</sub> Br <sub>0.1</sub> ) <sub>3</sub> /Spiro-<br>OMeTAD/Au | 520                                   | 8.8×10 <sup>12</sup>       | 300-810            | 5                    |
| ITO/SnO <sub>2</sub> /MAPbI <sub>3</sub> / Carbon                                                                                                          | 260                                   | 7.01×10 <sup>11</sup>      | 400-800            | 5                    |
| FTO/NiO <sub>x</sub> /MAPbI <sub>3</sub> /PCBM/PPDIN <sub>6</sub> /Ag                                                                                      | 63.7                                  | 1.27×10 <sup>12</sup>      | 300-800            | 6                    |
| ITO/P3HT/Perovskite/Spiro-OMeTAD/Ag                                                                                                                        | 410                                   | 6.1×10 <sup>10</sup>       | 410-780            | 7                    |
| SVO/Cs <sub>0.05</sub> (FA <sub>0.85</sub> MA <sub>0.15</sub> ) <sub>0.95</sub> Pb(I <sub>0.85</sub> Br <sub>0.15</sub> ) <sub>3</sub> /Ag                 | 42.5                                  |                            | 400-750            | 8                    |
| ITO/PTAA/FAPbI <sub>3</sub> /C <sub>60</sub> /BCP/Ag                                                                                                       | 450                                   | 1.18×10 <sup>12</sup>      | 350-800            | 9                    |
| ITO/SnO <sub>2</sub> /Cs <sub>x</sub> DMA <sub>1-x</sub> PbI <sub>3</sub> films/PCBM/Bphen/Cu                                                              | 380                                   | 1×10 <sup>13</sup>         | 420-700            | 10                   |
| GZO NRs/MAPbI <sub>3</sub> /MoO <sub>3</sub> /Au                                                                                                           | 340                                   | 1.6×10 <sup>12</sup>       | 350-800            | 11                   |
| <b>ITO/SnO<sub>2</sub>/FA<sub>0.2</sub>A<sub>0.8</sub>PbI<sub>3</sub>/Spiro-OMeTAD/Au</b>                                                                  | <b>470</b>                            | <b>3.4×10<sup>12</sup></b> | <b>340-800</b>     | <b>This<br/>work</b> |

**Table S4.** Key figure-of-merit values for SPPD fabricated in the present study compared with those of devices

reported in the literature under the specific wavelengths

| Structure                                                                                                                                                                 | Responsivity<br>(mA W <sup>-1</sup> ) | Detectivity<br>(Jones)     | Test conditions                                         | Ref.                 |
|---------------------------------------------------------------------------------------------------------------------------------------------------------------------------|---------------------------------------|----------------------------|---------------------------------------------------------|----------------------|
| Au/CH <sub>3</sub> NH <sub>3</sub> PbI <sub>3</sub> /MWs/Ag                                                                                                               | 160                                   | 1.3×10 <sup>12</sup>       | 520nm/9×10 <sup>-3</sup> mw cm <sup>-2</sup>            | 12                   |
| FTO/CdS <sub>10</sub> /MAPbI <sub>3</sub> /Spiro-OMeTAD/Ag                                                                                                                | 480                                   | 2.1×10 <sup>13</sup>       | 700nm/4.57×10 <sup>-3</sup> mw<br>cm <sup>-2</sup>      | 13                   |
| Al/CH <sub>3</sub> NH <sub>3</sub> PbI <sub>3</sub> nanowires/Ni                                                                                                          | 227                                   | 1.36×10 <sup>11</sup>      | 532nm/1×10 <sup>-5</sup> mw cm <sup>-2</sup>            | 14                   |
| ITO/CdS/MAPbI <sub>3</sub> /Au                                                                                                                                            | 430                                   | 2.3×10 <sup>11</sup>       | 730nm/10 mw cm <sup>-2</sup>                            | 15                   |
| ITO/SnO <sub>2</sub> /Cs <sub>0.05</sub> (FA <sub>0.85</sub> MA <sub>0.15</sub> ) <sub>0.95</sub> Pb(I <sub>0.85</sub> Br <sub>0.15</sub> ) <sub>3</sub> /Spiro-OMeTAD/Ag | 473                                   | 1.35×10 <sup>13</sup>      | 720nm/ 5.4×10 <sup>-3</sup> mW<br>cm <sup>-2</sup>      | 16                   |
| ITO/PMMA/MAPbBr <sub>3</sub> /Au                                                                                                                                          | 380                                   | 1.7×10 <sup>12</sup>       | 520nm/10×10 <sup>-3</sup> mw cm <sup>-2</sup>           | 17                   |
| ITO/PTAA/Cs <sub>x</sub> FA <sub>1-x</sub> Pb(I <sub>1-y</sub> Br <sub>y</sub> ) <sub>3</sub> /PCBM/BCP/Cu                                                                | 403                                   | 6.1×10 <sup>13</sup>       | 650nm/73×10 <sup>-3</sup> mw cm <sup>-2</sup>           | 18                   |
| ITO/PEDOT:PSS/MAPb(I <sub>1-x</sub> Br <sub>x</sub> ) <sub>3</sub> /PCBM/Ag                                                                                               | 31                                    | 4×10 <sup>9</sup>          | 780nm/6.36 mw cm <sup>-2</sup>                          | 19                   |
| ITO/PEDOT:PSS/MAPbI <sub>3</sub> /PMMA/PCBM/Ag                                                                                                                            | 460                                   | 3.18×10 <sup>10</sup>      | 671nm/6.5 mw cm <sup>-2</sup>                           | 20                   |
| ITO/ZnO:PBI-H/MAPbI <sub>3</sub> /Spiro-OMeTAD/Ag                                                                                                                         | 350                                   | 2.5×10 <sup>13</sup>       | 670nm/126×10 <sup>-3</sup> mw<br>cm <sup>-2</sup>       | 4                    |
| <b>ITO/SnO<sub>2</sub>/FA<sub>0.2</sub>A<sub>0.8</sub>PbI<sub>3</sub>/Spiro-OMeTAD/Au</b>                                                                                 | <b>512</b>                            | <b>3.4×10<sup>12</sup></b> | <b>671nm/3.4×10<sup>-3</sup> mw<br/>cm<sup>-2</sup></b> | <b>This<br/>work</b> |

## References

- 1 W. Qu, S. Weng, L. Zhang, M. Sun, B. Liu, W. Du and Y. Zhang, *Appl. Phys. Express*, 2020, **3**, 121001.
- 2 Z. Ma, Y. Zhang, T. Li, X. Tang, H. Zhao, J. Li, C. Ma and J. Yao, *Appl. Phys. A Mater. Sci. Process.*, 2020, **126**, 869.
- 3 C. Shan, F. Meng, J. Yu, Z. Wang, W. Li, D. Fan, R. Chen, H. Ma, G. Li and A. K. K. Kyaw, *J. Mater. Chem. C*, 2021, **9**, 7632–7642.
- 4 Q. Zhang, M. Shou, Y. Xu, J. Zheng, X. Wen, Y. Zhao, H. Wang, L. Liu and Z. Xie, *J. Mater. Chem. C*, 2020, **8**, 16506–16512.
- 5 G. R. Adams, V. O. Eze, M. A. S. Shohag, R. Simpson, H. Parker and O. I. Okoli, *Eng. Res. Express*, 2020, **2**, 015043.
- 6 J. Wang, S. Xiao, W. Qian, K. Zhang, J. Yu, X. Xu, G. Wang, S. Zheng and S. Yang, *Adv. Mater.*, 2021, **33**, 2005557.
- 7 D. Wang, W. Xu, L. Min, W. Tian and L. Li, *Adv. Mater. Interfaces*, 2022, **9**, 2101766.
- 8 R. Xu, L. Min, Z. Qi, X. Zhang, J. Jian, Y. Ji, F. Qian, J. Fan, C. Kan, H. Wang, W. Tian, L. Li, W. Li and H. Yang, *ACS Appl. Mater. Interfaces*, 2020, **12**, 16462–16468.
- 9 X. Feng, M. Tan, M. Li, H. Wei and B. Yang, *Nano Lett.*, 2021, **21**, 1500–1507.
- 10 L. Li, F. Zhang, S. Ye, X. Peng, Z. Sun, J. Lian, L. Liu, J. Qu and J. Song, *Nano Energy*, 2020, **71**, 104611.
- 11 H. Zhou, L. Yang, P. Gui, C. R. Grice, Z. Song, H. Wang and G. Fang, *Sol. Energy Mater. Sol. Cells*, 2019, **193**, 246–2521.
- 12 Y. Wu, P. Wang, F. Ting, B. Wang, C. Xie, W. Li, W. Wang, *Adv. Electron. Mater.*, 2019, 5(5): 1900135.
- 13 F. Cao, L. Meng, M. Wang, W. Tian and L. Li, *Adv. Mater.*, 2019, 31(12): 1806725.
- 14 J. Tao, Z. Xiao, J. Wang, C. Li, X. Sun, F. Li, X. Zou, G. Liao and Z. Zou, *J. Alloys Compd.*, 2020, **845**, 155311.
- 15 Z. Li, H. Li, K. Jiang, D. Ding, J. Li, C. Ma, S. Jiang, Y. Wang, T. D. Anthopoulos and Y. Shi, *ACS Appl. Mater. Interfaces*, 2019, **11**, 40204–40213.
- 16 W. Tian, L. Min, F. Cao and L. Li, *Adv. Mater.*, 2020, **32**, 1906974.
- 17 C. Li, J. Li, C. Li, J. Wang, X. Tong, Z. Zhang, Z. Yin, D. Wu and L. Luo, *Ad. Optical Mater.*, 2021, **9**, 2100371.
- 18 E. López-fraguas, B. Arredondo, C. Vega-colado, M. Naja, D. Martín-martín, Y. Galagan, J. M. Sánchez-pena, R. Vergaz and B. Romero, *Organic Electronics*, 2019, **73**, 292–298.
- 19 S. Qiao, Y. Liu, J. Liu, G. Fu and S. Wang, *ACS Appl. Mater. Interfaces*, 2021, **13**, 34625–34636.
- 20 Y. Liu, S. Qiao, H. Sun, J. Liu, L. Guo, Z. Yang, G. Fu and S. Wang, *ACS Appl. Nano Mater.*, 2021, **4**, 1682–1691.
